# Supplementary material
Source: PubMed Central journal article supplement (PMC4633772)
Supplement: ac5b03003_si_001.pdf [file ac5b03003_si_001.pdf]

*Supporting Information:*

**Thermal Degradation of Small Molecules: A Global Metabolomic  
Investigation**

Mingliang Fang<sup>1</sup>, Julijana Ivanisevic<sup>1</sup>, Caroline H. Johnson<sup>1</sup>, Michael E Kurczy<sup>1</sup>, Gary J Patti<sup>2</sup>,  
Linh T. Hoang<sup>1</sup>, Winnie Uritboonthai<sup>1</sup>, H. Paul Benton<sup>1</sup>, Gary Siuzdak\*<sup>1,3</sup>

<sup>1</sup>*Scripps Center for Metabolomics and Mass Spectrometry, The Scripps Research Institute, 10550 North  
Torrey Pines Road, La Jolla, California 92037, United States*

<sup>2</sup>*Department of Chemistry, Washington University in St. Louis, One Brookings Drive, St. Louis, Missouri  
63130, USA*

<sup>3</sup>*Departments of Chemistry, Molecular and Computational Biology, The Scripps Research Institute,  
10550 North Torrey Pines Road, La Jolla, California 92037, United States*

\*Corresponding Author

Phone: 858-784-9415. Email: [siuzdak@scripps.edu](mailto:siuzdak@scripps.edu)

## Table of Contents

|                                                                                                                                                                                                                                                                                                                                                                                                                                                                                                                                                                                                    |     |
|----------------------------------------------------------------------------------------------------------------------------------------------------------------------------------------------------------------------------------------------------------------------------------------------------------------------------------------------------------------------------------------------------------------------------------------------------------------------------------------------------------------------------------------------------------------------------------------------------|-----|
| Text S1 Chemical Materials.....                                                                                                                                                                                                                                                                                                                                                                                                                                                                                                                                                                    | S4  |
| Text S2 LC/MS Analysis.....                                                                                                                                                                                                                                                                                                                                                                                                                                                                                                                                                                        | S5  |
| Text S3 Data Analysis.....                                                                                                                                                                                                                                                                                                                                                                                                                                                                                                                                                                         | S6  |
| Text S4 QA/QC.....                                                                                                                                                                                                                                                                                                                                                                                                                                                                                                                                                                                 | S7  |
| Table S1. The calculated derivatization efficiency and response ratio (average±std) between 250°C 60s/300s and 25°C of the 64 tested compounds as well as their KEGG IDs.....                                                                                                                                                                                                                                                                                                                                                                                                                      | S8  |
| Table S2. The number of total features, significantly altered features, upregulated and downregulated features of heated raw and derivatized plasma metabolites analyzed using both RP-ESI (+) and HILIC-ESI (-). All the data were from the output of XCMS Online software.....                                                                                                                                                                                                                                                                                                                   | S11 |
| Table S3. The number of total features, significantly altered features ( $p < 0.01$ ), upregulated and downregulated features of heated underivatized and derivatized small molecule mixtures with both RP-ESI (+) and HILIC-ESI (-).....                                                                                                                                                                                                                                                                                                                                                          | S12 |
| Figure S1. The percentage of altered (both upregulated and downregulated) features compared to the total features in the underivatized and derivatized plasma metabolites heated at 60°C, 100°C, and 250°C for 30s, 60s, and 300s. The subsequent analyses were performed using: a) HILIC-ESI (-) and overall results displayed with b) principal component analysis scores plots of 25°C and 250°C for 300s heated plasma. All the upregulated and downregulated features were from pairwise comparison of each tested condition with room temperature (25°C) and filtered using $p < 0.01$ ..... | 13  |
| Figure S2. Principal component analysis scores plot for group a) underivatized plasma metabolites heated at 25°C, 60°C for 30s, 60s and 300s; b) underivatized plasma metabolites heated at 25°C, 100°C for 30s, 60s and 300s; c) underivatized plasma metabolites heated at 25°C, 250°C for 30s, 60s and 300s; and d) derivatized plasma metabolites heated at 25°C and 250°C for 30s, 60s and 300s analyzed using RP-ESI (+).....                                                                                                                                                                | S14 |
| Figure S3. Response change of linoleic acid heated at different temperatures and heating times in the underivatized plasma metabolites.....                                                                                                                                                                                                                                                                                                                                                                                                                                                        | S15 |
| Figure S4. a) Cloud plot showing altered metabolite features (represented by “bubbles”) between the 250°C 300s and 25°C heated metabolite mixtures analyzed using HILIC-ESI (-); and b) PCA scores plot of underivatized metabolite mixture at room temperature (25°C) and heated with 250°C at 60s and 300s.....                                                                                                                                                                                                                                                                                  | S17 |
| Figure S5. Formation of adenine, adenosine, AMP and ADP from single 10 µM ATP heating at A). 150 °C for 30s, 60s, 120s, and 300s; B). 250 °C for 30s, 60s, 120s, and 300s; and formation of hypoxanthine (HPX) from single 10 µM inosine and IMP heating at C). 250 °C for 30s, 60s, 120s, and 300s.....                                                                                                                                                                                                                                                                                           | S18 |
| Figure S6. Identification of oleoyl ethyl amide as a possible byproduct during heating. a) MS/MS match with the standard metabolite fragments in METLIN library with a collision energy of 20V; b) the                                                                                                                                                                                                                                                                                                                                                                                             |     |

formation of oleoyl ethyl amide in the heated underivatized and derivatized metabolite mixture as well as plasma metabolites at 250°C for 60 and 300s..... S19

Figure S7. Examples of MS/MS fragments in the targeted MS/MS ( $m/z$  400.3148, 272.254, and 300.2855) using RP-ESI (+)..... S20

**Text S1 Chemical Materials.**

Pyridine (Acros Organics, cat. No. 131980010) was purchased from Thermo Fisher Scientific. N,O-Bis(trimethylsilyl)trifluoroacetamide (BSTFA) and trimethylchlorosilane (TCMS) mixture (99:1) and methoxyamine hydrochloride (98%) were purchased from Sigma-Aldrich (St. Louis, MO, US). A chemical mixture of 64 small molecule metabolite standards (~20  $\mu$ M each) was prepared in this study. The full list of those small molecules was detailed in Table S-1 in the supporting information (SI). Generally, several groups of small molecules include amino acids, organic acids, sugars and sugar phosphates, and several free fatty acids. These metabolites are involved in several central carbon pathways; glycolysis, purine metabolism, pyrimidine metabolism, citric acid cycle (TCA cycle) and biosynthesis of amino acids, and as such are important to include in the study.

### **Text S2 LC/MS Analysis.**

Analyses of the underivatized and derivatized plasma samples were performed using an HPLC system (1200 series, Agilent Technologies) coupled to a 6538 UHD Q-TOF (Agilent Technologies, Santa Clara, CA). Samples were analyzed using a XBridge C18 column (3.5  $\mu\text{m}$ , 150 mm  $\times$  1.0 mm I.D., Waters, Milford, MA) for RPLC/MS analysis in ESI positive mode (RP-ESI (+)), and a Luna Aminopropyl column (3  $\mu\text{m}$ , 150 mm  $\times$  1.0 mm I.D., Phenomenex, Torrance, California) for HILIC/MS analysis in ESI negative mode (HILIC-ESI (-)). For the RPLC/MS, the linear gradient elution from 100% in water with 0.1% formic acid (0–5 min) to 100% in acetonitrile with 0.1% formic acid (50–55 min) was applied. For the HILIC/MS, the mobile phase was composed of A = 20 mM ammonium acetate and 40 mM ammonium hydroxide in 95% water and 5 % acetonitrile and B = 95% acetonitrile, 5 % water<sup>1</sup>. The linear gradient elution started from 100% B (0–5 min) to 100% A (50–55 min) was applied. A 10 min post-run was applied for both RPLC and HILIC to ensure the column re-equilibration. The flow rate was 20 and 65  $\mu\text{L}/\text{min}$  for RPLC and HILIC; respectively. The sample injection volume was 8  $\mu\text{L}$ . ESI source conditions were set as follows: gas temperature 325  $^{\circ}\text{C}$ , drying gas 5 L/min, nebulizer 15 psi, fragmentor 120 V, skimmer 65 V, and capillary voltage 4000 V or  $-4000$  V in ESI (+) or ESI (-); respectively. The instrument was set to acquire over the m/z range 50–1000, with the MS acquisition rate of 4 spectra/s.

To increase the sensitivity of metabolite detection, the underivatized and derivatized small molecule mixture were analyzed by HPLC system (1200 series, Agilent Technologies) coupled to 6550 iFunnel QTOF mass spectrometer (Agilent Technologies, Santa Clara, CA). The mobile phase was identical with the above-mentioned method. ESI source conditions were set as follows: dry gas temperature 200 $^{\circ}\text{C}$ , fragmentor 380 V, sheath gas temperature 300 $^{\circ}\text{C}$  and flow 11 L/min, nozzle voltage 500 V, and capillary voltage 2,500 V and  $-2,500$  V in ESI (+) or ESI (-); respectively. The instrument was set to acquire over the m/z range 50–1,000, with the MS acquisition rate of 2 spectra/s. For the MS/MS of selected precursors, the default isolation width was set as narrow ( $\sim 1.3$  m/z), with a MS acquisition rate at 2 spectra/s and MS/MS acquisition at 2 spectra/s to acquire over the m/z range 50–1000 and 25–1000; respectively. MS/MS data were acquired at the collision energy of 20 V.

### **Text S3 Data Analysis.**

LC/MS data were converted to mzXML files using Masshunter Acquisition Software (Agilent Masshunter 6.0B). The mzXML files were uploaded to XCMS Online web platform for data processing (<https://xcmsonline.scripps.edu>)<sup>2-5</sup> including peak detection, retention time correction, profile alignment, and isotope annotation. Data were processed using both pair-wise and multigroup comparison, and the parameter settings were as follows: centWave for feature detection ( $\Delta m/z = 15$  ppm, minimum peak width = 10 s, and maximum peak width = 60 s); obiwrap settings for retention time correction (profStep = 0.5); and parameters for chromatogram alignment, including mzwid = 0.015, minfrac = 0.5, and bw = 5. The relative quantification of metabolite features was based on extracted ion chromatogram (EIC) areas. Paired parametric *t*-test and one-way ANOVA (post hoc Tukey test) were used to test the variation pattern of metabolite features between and across samples treated with different heating temperatures and time. To estimate the heating effect on the global molecular profiling, pairwise comparisons between each tested temperature at individual time and its 25°C control were conducted. Furthermore, multiple group analysis including each temperature with different heating periods and their 25°C control was carried out to observe time course dependence. The results output, including EICs, pairwise/multigroup cloud plot, multidimensional scaling plots, and principle components were exported directly from XCMS Online. Generally, the numbers of total pairwise comparison features and significantly altered features (statistically defined as  $p < 0.01$ , including both upregulated and downregulated features) were reported in this study. The percentage of altered features compared to the total features was calculated to quantitatively describe the heating effect on the global metabolic profiling.

**Text S4 QA/QC.**

Triplicates and one heated blank control were prepared for each sample at one temperature and sampling time. The result showed that no obvious difference between the heated blank control and the solvent blank (room temperature), suggesting that negligible background contamination from the septum cap or the vial during the heating process. During the sample analysis on the LC/MS, the triplicates of each sample were run separately in the worklist. To correct the mass, retention time and response drift, an underivatized plasma metabolites and the mixture of 64 small molecules were run every five samples to ensure the result consistent and comparable. Metabolite identification was based on accurate mass (within 10 ppm), retention time comparison with our previous running, and MS/MS data. All samples especially the derivatized samples were analyzed within 48 hours after the sample collection.

**Table S1. The calculated derivatization efficiency and response ratio (average±std) between 250°C 60s/300s and 25°C of the underivatized 64 tested compounds as well as their KEGG IDs.**

| KEGG ID                          | Compounds           | Derivatization efficiency (%) | Response Ratio (250°C, 60s vs.25°C) | Response Ratio (250°C, 300s vs.25°C) |
|----------------------------------|---------------------|-------------------------------|-------------------------------------|--------------------------------------|
| <i>Pyrimidine metabolism</i>     |                     |                               |                                     |                                      |
| C00299                           | Uridine             | 67%                           | 136.4±10.8%                         | 94.4±7.6%                            |
| C00105                           | UMP                 | <5%                           | 235.2±15.3%                         | 198.2±25.0%                          |
| C00015                           | UDP                 | <10%                          | 27.0±6.5%                           | 9.8±2.6%                             |
| C00075                           | UTP                 | 98%                           | 2.4±0.9%                            | 0.7±0.5%                             |
| C00063                           | CTP                 | 96%                           | 19.2±4.9%                           | 7.5±1.2%                             |
| C00112                           | CDP                 | 42%                           | 25.7±7.2%                           | 0.5±0.7%                             |
| C05822                           | CMP                 | <5%                           | 121.9±2.4%                          | 34.8±8.4%                            |
| C00475                           | Cytidine            | 69%                           | 92.6±10.7%                          | 6.5±2.2%                             |
| <i>Purine metabolism</i>         |                     |                               |                                     |                                      |
| C00002                           | ATP                 | 100%                          | 1.9±0.9%                            | 0.1±0.1%                             |
| C00008                           | ADP                 | 58%                           | 14.4±6.7%                           | 0.2±0.1%                             |
| C00020                           | AMP                 | <5%                           | 158.6±9.5%                          | 11.6±3.6%                            |
| C00212                           | Adenosine           | 47%                           | 47.4±8.5%                           | 5.6±2.8%                             |
| C00147                           | Adenine             | 60%                           | 20.6±5.8%                           | 9.7±1.2%                             |
| C00130                           | IMP                 | <5%                           | 100.4±19.3%                         | 30.7±9.2%                            |
| C00294                           | Inosine             | 27%                           | 30.5±8.5%                           | 2.9±0.5%                             |
| C00262                           | Hypoxanthine        | <5%                           | 246.4±39.0%                         | 275.2±24.4%                          |
| C06193                           | GMP                 | <5%                           | 196.6±17.7%                         | 25.5±5.1%                            |
| C00035                           | GDP                 | 66%                           | 7.7±5.1%                            | 0.0±0.1%                             |
| C00044                           | GTP                 | 100%                          | 2.8±1.4%                            | 0.2±0.2%                             |
| C00387                           | Guanosine           | NA                            | 88.8±6.7%                           | 3.6±0.9%                             |
| C00366                           | Uric acid           | <5%                           | 144.4±11.0%                         | 144.7±4.5%                           |
| C00385                           | Xanthine            | <5%                           | 90.5±4.6%                           | 101.3±1.2%                           |
| <i>Pentose phosphate pathway</i> |                     |                               |                                     |                                      |
| C00117                           | Ribose-1-phosphate  | 100%                          | 0.4±0.2%                            | 0.0±0.0%                             |
| C00117                           | Ribose-5-phosphate  | 100%                          | 0.4±0.2%                            | 0.0±0.0%                             |
| C00119                           | PRPP                | NA                            | NA                                  | NA                                   |
| <i>Glycolysis</i>                |                     |                               |                                     |                                      |
| C00092                           | Glucose-6-phosphate | 100%                          | 0.2±0.1%                            | 0.0±0.0%                             |



|                                                           |                           |      |            |             |
|-----------------------------------------------------------|---------------------------|------|------------|-------------|
| C05345                                                    | Fructose-6-phosphate      | 100% | 0.2±0.1%   | 0.0±0.0%    |
| C00354                                                    | Fructose-1,6-bisphosphate | NA   | 0.9±1.3%   | 0.0±0.0%    |
| C00118                                                    | Glyceraldehyde-3P         | NA   | NA         | NA          |
| C00197                                                    | Glycerate-3P              | 41%  | 4.4±2.6%   | 0.3±0.0%    |
| C00074                                                    | Phosphoenol pyruvate      | 100% | 0.0±0.0%   | 0.0±0.0%    |
| C00022                                                    | Pyruvate                  | NA   | NA         | NA          |
| C00024                                                    | Acetyl-CoA                | 100% | 0.7±0.4%   | 0.0±0.0%    |
| C01432                                                    | Lactate                   | 100% | 95.0±34.4% | 148.4±33.4% |
| <b><i>TCA cycle</i></b>                                   |                           |      |            |             |
| C00158                                                    | Citric acid               | <10% | 48.3±5.2%  | 4.7±%       |
| C00158                                                    | Isocitric acid            | <10% | 48.3±5.2%  | 4.7±%       |
| C00026                                                    | alpha-ketoglutarate       | 100% | 32.2±3.3%  | 29.7±20.2%  |
| C00042                                                    | Succinate                 | <5%  | 27.8±3.9%  | 0.7±0.6%    |
| C00122                                                    | Fumarate                  | NA   | NA         | NA          |
| C00149                                                    | Malate                    | <5%  | 287.5±80%  | 324.1±21%   |
| <b><i>Biosynthesis of amino acids</i></b>                 |                           |      |            |             |
| C00073                                                    | Methionine                | NA   | NA         | NA          |
| C00078                                                    | Tryptophan                | 60%  | 22.4±13.0% | 2.9±0.7%    |
| C00082                                                    | Tyrosine                  | 25%  | 38.0±8.3%  | 0.4±0.8%    |
| C00956                                                    | Aminoadipic acid          | 61%  | 1.3±1.6%   | 0.0±0.0%    |
| C00449                                                    | Saccharopine              | 72%  | 0.1±0.1%   | 0.1±0.2%    |
| C00047                                                    | Lysine                    | NA   | NA         | NA          |
| C00025                                                    | Glutamate                 | <5%  | 5.5±4.5%   | 0.1±0.1%    |
| C00624                                                    | Acetyl-glutamic acid      | <5%  | 82.7±4.4%  | 32.2±9.6%   |
| C0064                                                     | Glutamine                 | NA   | NA         | NA          |
| C01602                                                    | Ornithine                 | NA   | NA         | NA          |
| C00062                                                    | Arginine                  | <5%  | NA         | NA          |
| C05824                                                    | Cysteine sulfate          | 36%  | 3.2±1.4%   | 0.0±0.0%    |
| <b><i>Oxidative phosphorylation</i></b>                   |                           |      |            |             |
| C00003                                                    | NAD+                      | 100% | 0.8±0.3%   | 0.1±0.0%    |
| C00004                                                    | NADH                      | 100% | 2.3±0.4%   | 0.6±0.0%    |
| <b><i>Amino sugar and nucleotide sugar metabolism</i></b> |                           |      |            |             |
| C00052                                                    | UDP-galactose             | 100% | 25.9±2.6%  | 23.8±3.8%   |
| C00043                                                    | UDP-N-acetyl-glucosamine  | 100% | 1.5±0.3%   | 1.0±0.0%    |
| C00096                                                    | GDP-mannose               | 100% | 0.3±0.2%   | 0.1±0.0%    |

| <i>Glutathione metabolism</i>               |                      |      |            |            |
|---------------------------------------------|----------------------|------|------------|------------|
| C00127                                      | Oxidized glutathione | 61%  | 4.7±1.7%   | 0.1±0.0%   |
| C00006                                      | NADP+                | 100% | 0.5±0.2%   | 0.0±0.0%   |
| <i>Taurine &amp; Hypotaurine metabolism</i> |                      |      |            |            |
| C14179                                      | Sulfoacetic acid     | 41%  | 92.2±5.1%  | 83.0±2.6%  |
| <i>C5-branched dibasic acid metabolism</i>  |                      |      |            |            |
| C01732                                      | Mesaconic acid       | NA   | NA         | NA         |
| <i>Lipid metabolism</i>                     |                      |      |            |            |
| C01595                                      | Linoleic acid        | 85%  | 90.9±2.9%  | 57.9±10.2% |
| C00219                                      | Arachidonic acid     | NA   | NA         | NA         |
| C00712                                      | Oleic acid           | 85%  | 92.6±28.1% | 69.4±16.7% |
| C01530                                      | Stearic acid         | NA   | NA         | NA         |
| C04102                                      | PC(16:0/0:0)         | 83%  | 95.8±13.5% | 77.9±19.3% |

NA: not detected in the LC-MS with the spiked concentration or too high background ions.

**Table S2. The number of total features, significantly altered features, upregulated and downregulated features of heated raw and derivatized plasma metabolites analyzed using both RP-ESI (+) and HILIC-ESI (-). All the data were from the output of XCMS Online software.**

| Pairwise comparison                | Total number of features (RPLC/HILIC) | Number of altered features (RPLC/HILIC)* | Number of down-regulated features (RPLC/HILIC) | Number of the up-regulated features (RPLC/HILIC) | Percentage of dysregulated features in total features (RPLC/HILIC) | Percentage of upregulation in total dysregulated features (RPLC/HILIC) |
|------------------------------------|---------------------------------------|------------------------------------------|------------------------------------------------|--------------------------------------------------|--------------------------------------------------------------------|------------------------------------------------------------------------|
| 25°C vs. 60°C at 30s               | 5937/1807                             | 51/8                                     | 43/1                                           | 8/7                                              | 0.9%/0.4%                                                          | 15.7%/87.5%                                                            |
| 25°C vs. 60°C at 60s               | 6092/1807                             | 79/13                                    | 54/0                                           | 25/13                                            | 1.3%/0.4%                                                          | 31.6%/100%                                                             |
| 25°C vs. 60°C at 300s              | 6014/1796                             | 153/13                                   | 133/0                                          | 20/13                                            | 2.5%/0.7%                                                          | 13.1%/100%                                                             |
| 25°C vs. 100°C at 30s              | 5957/1816                             | 309/228                                  | 254/111                                        | 55/117                                           | 5.2%/0.3%                                                          | 17.8%/83.3%                                                            |
| 25°C vs. 100°C at 60s              | 5964/2437                             | 156/10                                   | 138/7                                          | 18/3                                             | 2.6%/0.4%                                                          | 11.5%/30.0%                                                            |
| 25°C vs. 100°C at 300s             | 6443/2121                             | 503/220                                  | 327/23                                         | 176/197                                          | 7.8%/10.4%                                                         | 35.0%/89.5%                                                            |
| 25°C vs. 250°C at 30s              | 6381/1761                             | 745/31                                   | 584/12                                         | 161/19                                           | 11.7%/1.8%                                                         | 21.6%/61.3%                                                            |
| 25°C vs. 250°C at 60s              | 6818/1693                             | 1105/81                                  | 831/48                                         | 274/33                                           | 16.2%/4.8%                                                         | 24.8%/40.7%                                                            |
| 25°C vs. 250°C at 300s             | 9757/1832                             | 3830/228                                 | 1494/111                                       | 2336/117                                         | 39.3%/12.4%                                                        | 61.0%/51.3%                                                            |
| Derivatized 25°C vs. 250°C at 30s  | 8355/1306                             | 1160/169                                 | 931/167                                        | 229/2                                            | 13.9%/12.9%                                                        | 19.7%/1.25                                                             |
| Derivatized 25°C vs. 250°C at 60s  | 8636/1306                             | 2747/126                                 | 2424/109                                       | 323/17                                           | 31.8%/9.6%                                                         | 11.8%/13.5%                                                            |
| Derivatized 25°C vs. 250°C at 300s | 11885/1306                            | 6147/169                                 | 3984/167                                       | 2188/2                                           | 51.7%/12.9%                                                        | 35.6%/1.2%                                                             |

\*The altered features were filtered with a  $p < 0.01$  and fold change  $> 1.5$ .

**Table S3. The number of total features, significantly altered features ( $p < 0.01$ ), upregulated and downregulated features of heated underivatized and derivatized metabolite mixtures with both RP-ESI (+) and HILIC-ESI (-). All the data was from the output of XCMS Online software.**

| Pairwise comparison                | Total numbers of features (RPLC/HILIC) | Number of altered features (RPLC/HILIC)* | Numbers of down-regulated features (RPLC/HILIC) | Numbers of the upregulated features (RPLC/HILIC) | Percentage of dysregulated features in total features (RPLC/HILIC) | Percentage of upregulation in total dysregulated features (RPLC/HILIC) |
|------------------------------------|----------------------------------------|------------------------------------------|-------------------------------------------------|--------------------------------------------------|--------------------------------------------------------------------|------------------------------------------------------------------------|
| 25°C vs. 250°C at 60s              | 17371/16054                            | 4370/4279                                | 2099/1519                                       | 2341/2760                                        | 26.7%/25.2%                                                        | 64.5%/53.6%                                                            |
| 25°C vs. 250°C at 300s             | 16415/23546                            | 4934/6416                                | 2623/1576                                       | 2311/4840                                        | 27.2%/30.1%                                                        | 75.4%/46.8%                                                            |
| Derivatized 25°C vs. 250°C at 60s  | 14076/8886                             | 1065/251                                 | 908/55                                          | 157/196                                          | 2.8%/7.6%                                                          | 78.1%/14.7%                                                            |
| Derivatized 25°C vs. 250°C at 300s | 14489/9479                             | 2884/760                                 | 2388/531                                        | 496/229                                          | 8.0%/19.9%                                                         | 30.1%/17.2%                                                            |

\*The altered features were filtered with a  $p < 0.01$ .

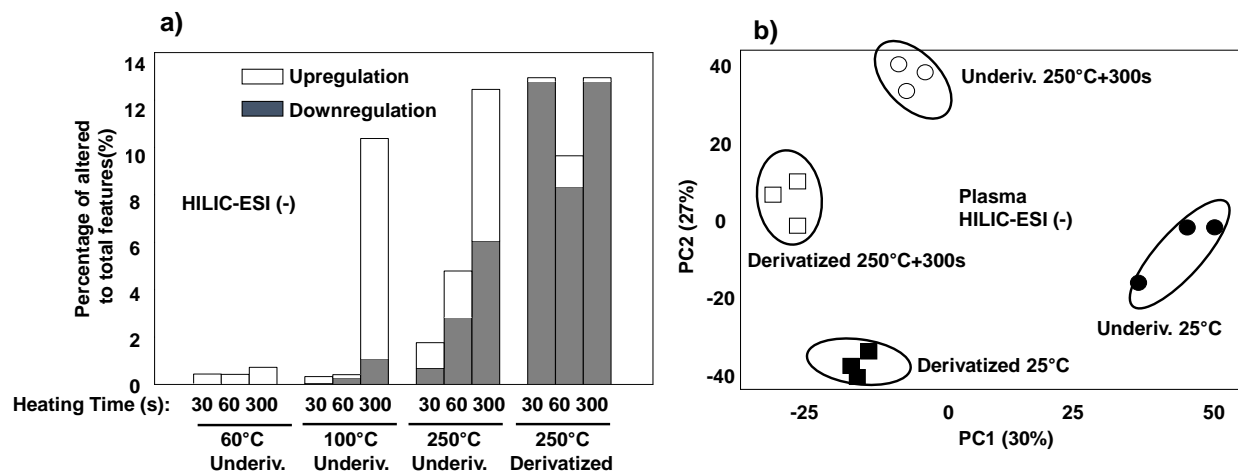

**Figure S1.** The percentage of altered (both upregulated and downregulated) features compared to the total features in the underderivatized and derivatized plasma metabolites heated at 60°C, 100°C, and 250°C for 30s, 60s, and 300s. The subsequent analyses were performed using: a) HILIC-ESI (-) and overall results displayed with b) principal component analysis (PCA) scores plots of 25°C and 250°C for 300s heated plasma. All the upregulated and downregulated features were from pairwise comparison of each tested condition with room temperature (25°C) and filtered using  $p < 0.01$ .

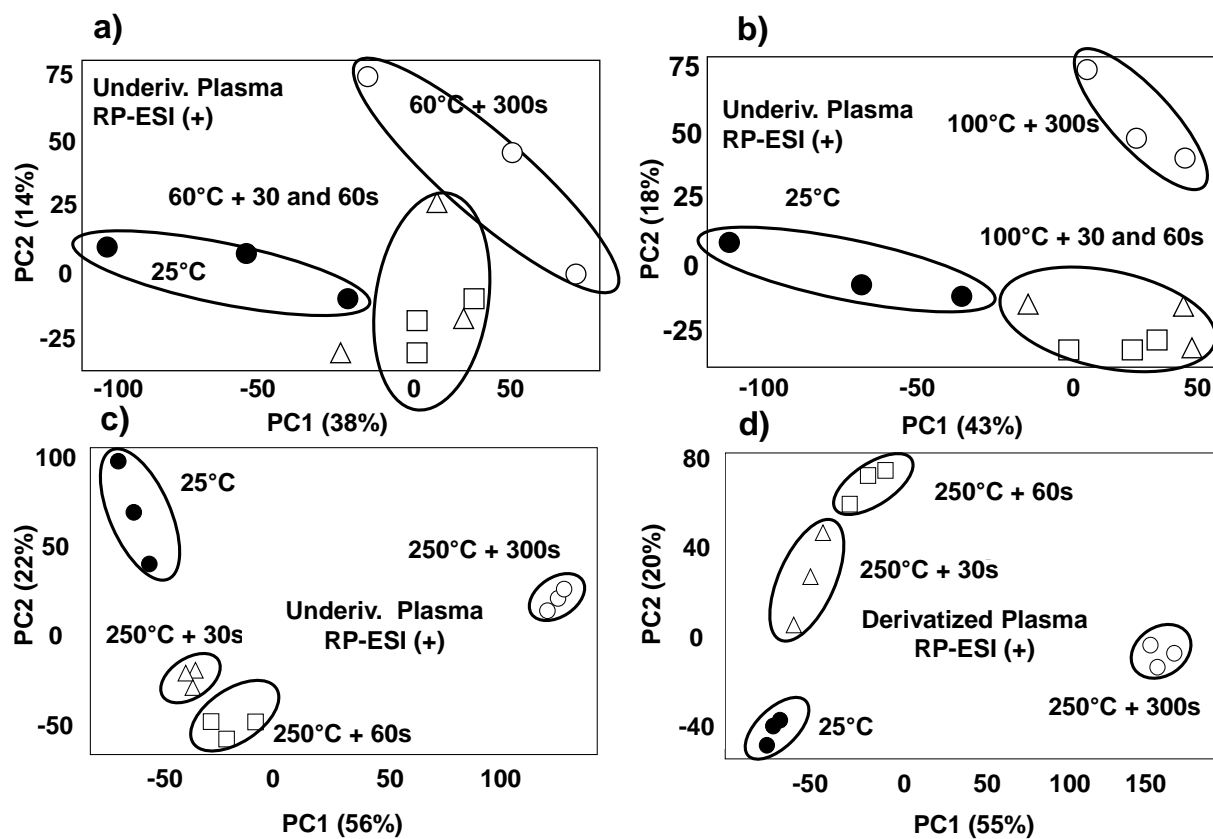

**Figure S2.** Principal component analysis (PCA) scores plot for group a) underivatized plasma metabolites heated at 25°C, 60°C for 30s, 60s and 300s; b) underivatized plasma metabolites heated at 25°C, 100°C for 30s, 60s and 300s; c) underivatized plasma metabolites heated at 25°C, 250°C for 30s, 60s and 300s; and d) derivatized plasma metabolites heated at 25°C and 250°C for 30s, 60s and 300s analyzed using RP-ESI (+).

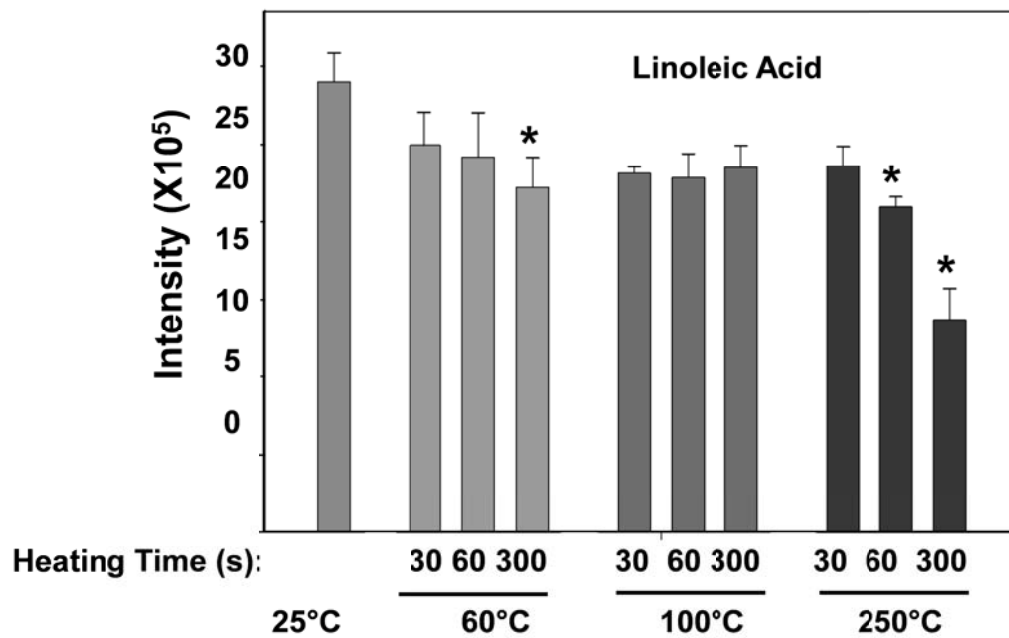

**Figure S3.** Response change of linoleic acid heated at different temperatures and heating times in the underivatized plasma metabolites. The results and the standard deviation were obtained from triplicate analysis.

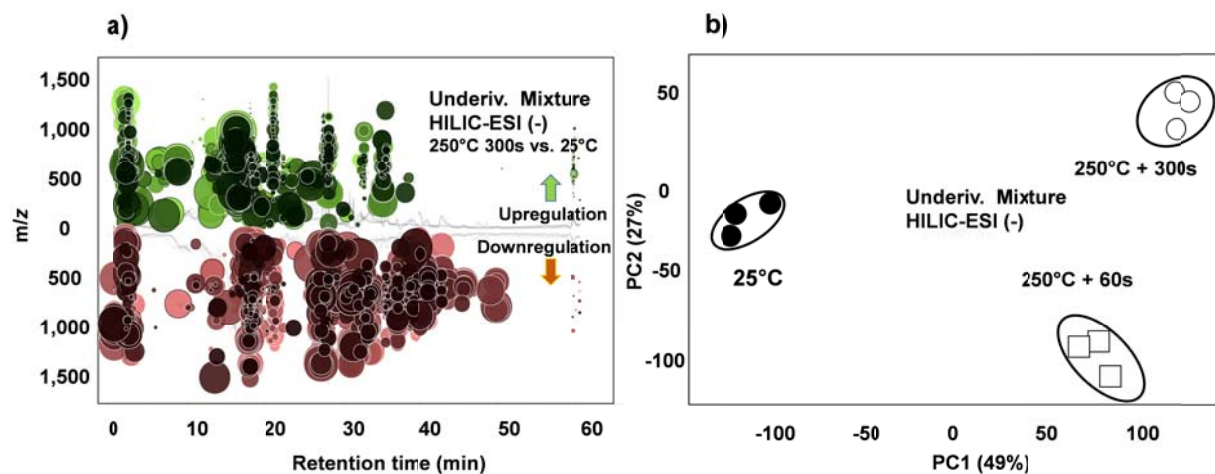

**Figure S4.** a) Cloud plot showing altered metabolite features (represented by “bubbles”) between the 250°C 300s and 25°C heated small molecule mixtures analyzed using HILIC-ESI (-); and b) PCA scores plot of underivatized metabolite mixture at room temperature (25°C) and heated with 250°C at 60s and 300s. The feature in the cloud pot was filtered with fold change > 1.5 and  $p < 0.01$ .



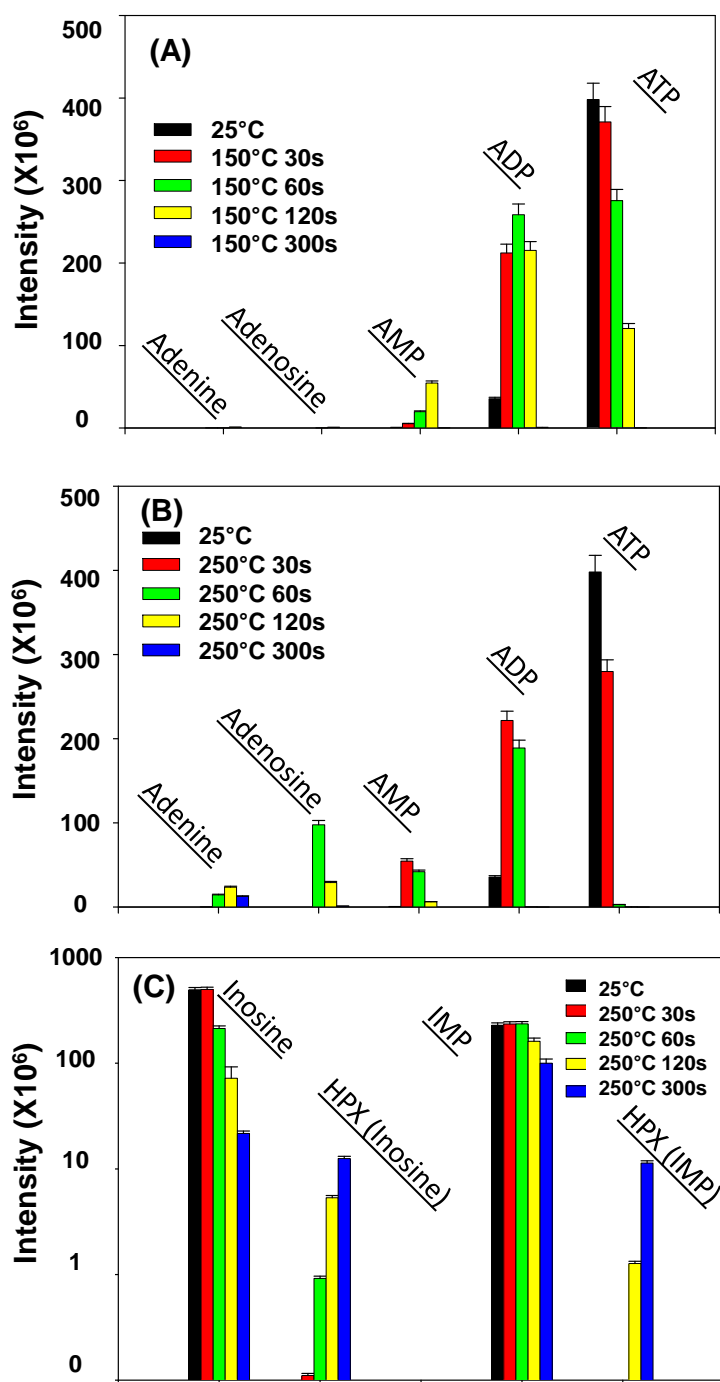

**Figure S5.** Formation of adenine, adenosine, AMP and ADP from single 10  $\mu$ M ATP heating at A). 150  $^{\circ}$ C for 30s, 60s, 120s, and 300s; B). 250  $^{\circ}$ C for 30s, 60s, 120s, and 300s; and formation of hypoxanthine (HPX) from single 10  $\mu$ M inosine and IMP heating at C). 250  $^{\circ}$ C for 30s, 60s, 120s, and 300s. The results and the standard deviation were obtained from triplicate analysis.

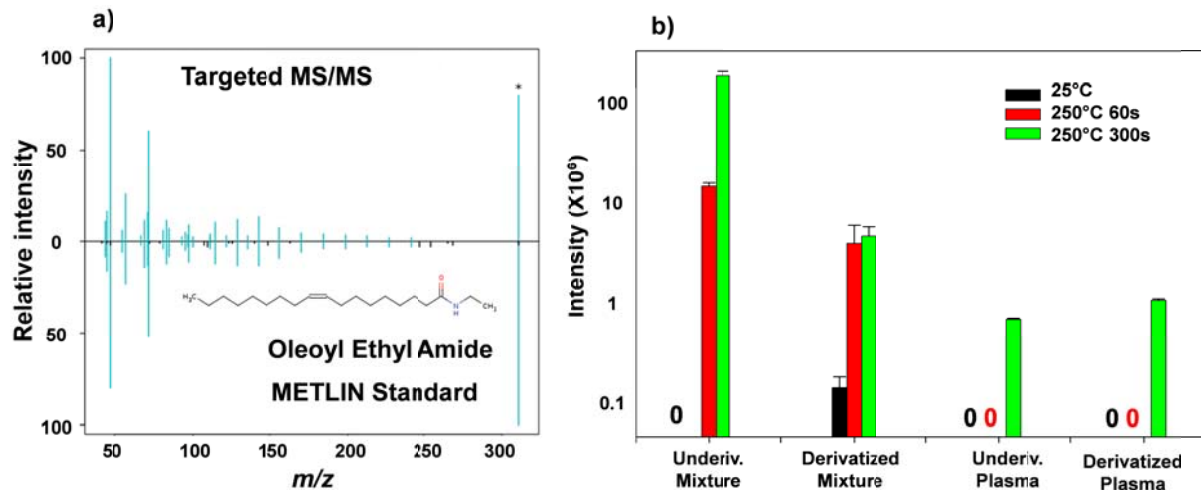

**Figure S6.** Identification of oleoyl ethyl amide as a possible byproduct during heating. a) MS/MS match with the standard metabolite fragments in METLIN library with a collision energy of 20V; b) the formation of oleoyl ethyl amide in the heated underivatized and derivatized metabolite mixture as well as plasma metabolites at 250°C for 60 and 300s. The result and the error bar were the average and standard deviation of triplicates; respectively.

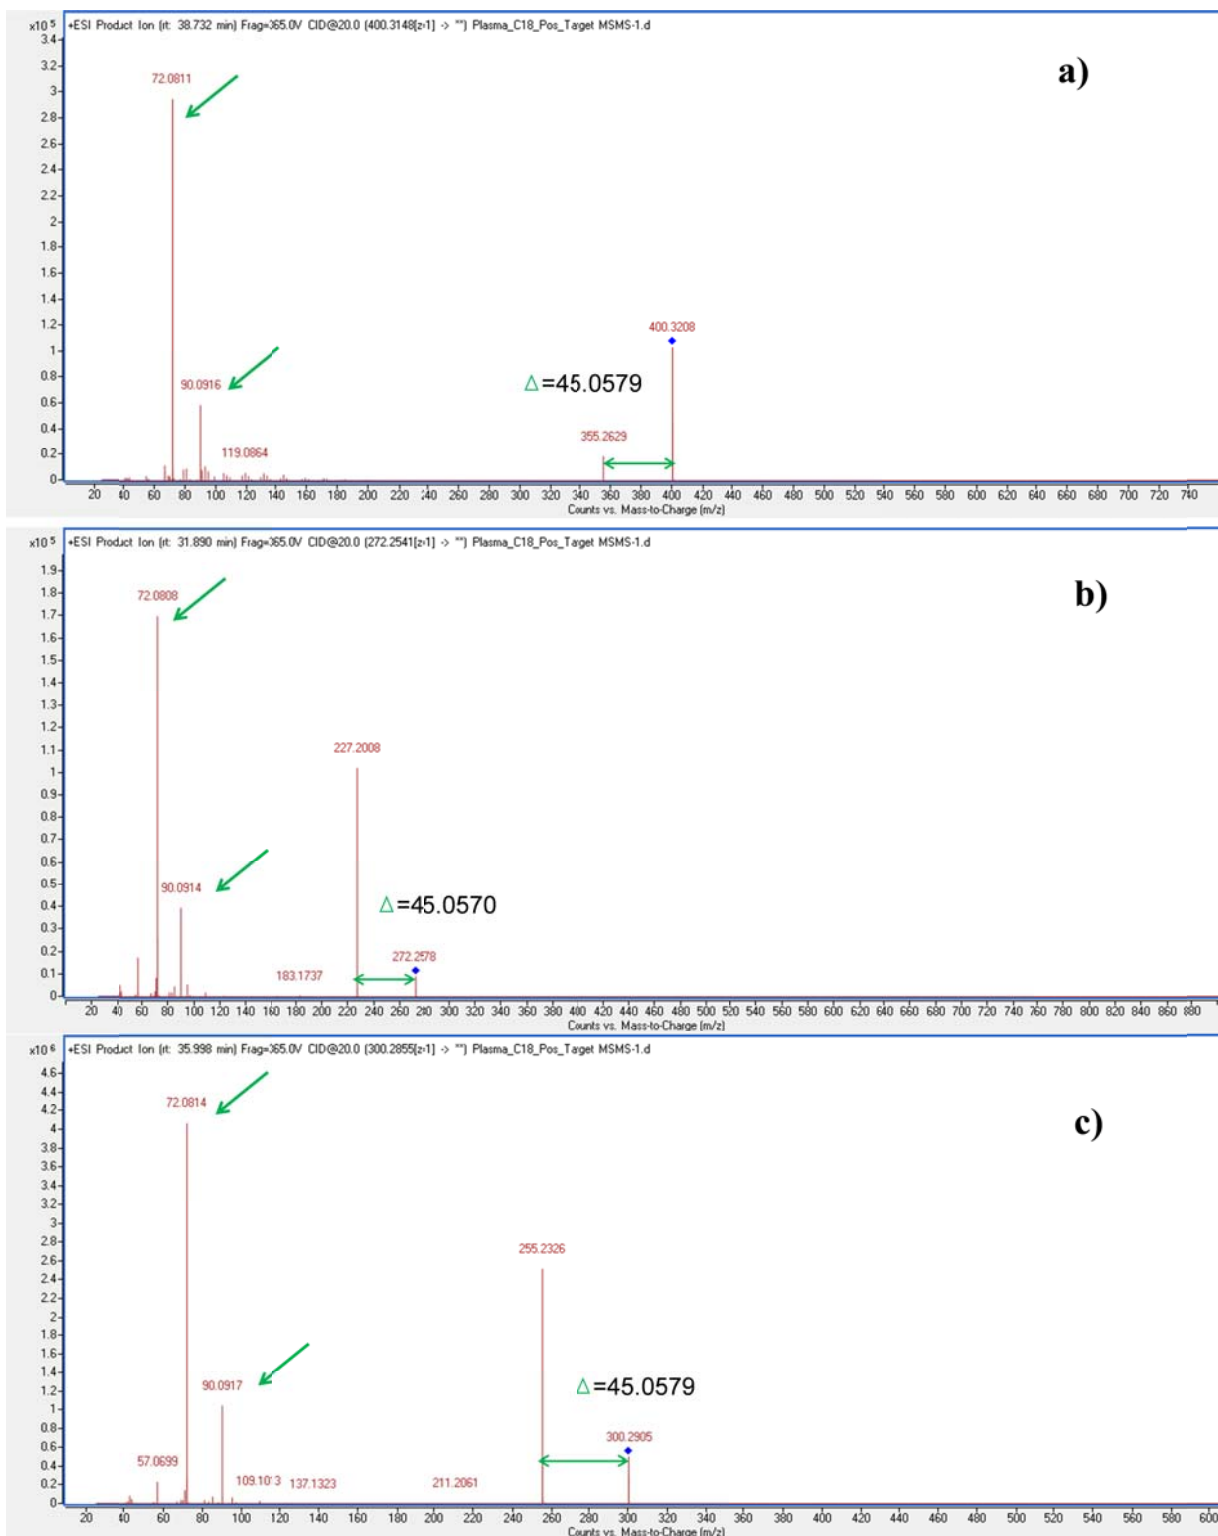

**Figure S7.** Examples of MS/MS fragments in the targeted MS/MS ( $m/z$  400.3148, 272.254, and 300.2855) using RP-ESI (+).

## References

- (1) Ivanisevic, J.; Zhu, Z. J.; Plate, L.; Tautenhahn, R.; Chen, S.; O'Brien, P. J.; Johnson, C. H.; Marletta, M. A.; Patti, G. J.; Siuzdak, G. *Analytical chemistry* 2013, 85, 6876-6884.
- (2) Nikolskiy, I.; Mahieu, N. G.; Chen, Y. J.; Tautenhahn, R.; Patti, G. J. *Analytical chemistry* 2013, 85, 7713-7719.
- (3) Patti, G. J.; Tautenhahn, R.; Siuzdak, G. *Nature protocols* 2012, 7, 508-516.
- (4) Smith, C. A.; Want, E. J.; O'Maille, G.; Abagyan, R.; Siuzdak, G. *Analytical chemistry* 2006, 78, 779-787.
- (5) Tautenhahn, R.; Patti, G. J.; Rinehart, D.; Siuzdak, G. *Analytical chemistry* 2012, 84, 5035-5039.
